# Supplementary material
Source: MDPI journal article supplement (https://www.mdpi.com/2673-1924/2/3/26)
Supplement: s1 [file s1]

## Supplementary Materials

### Otolith $\delta^{18}\text{O}$ Composition as a Tracer of Yellowfin Tuna (*Thunnus Albacares*) Origin in the Indian Ocean

Iraide Artetxe-Arrate, Igaratza Fraile, Jessica Farley, Audrey M. Darnaude, Naomi Clear, David L. Dettman, Campbell Davies, Francis Marsac and Hilario Murua

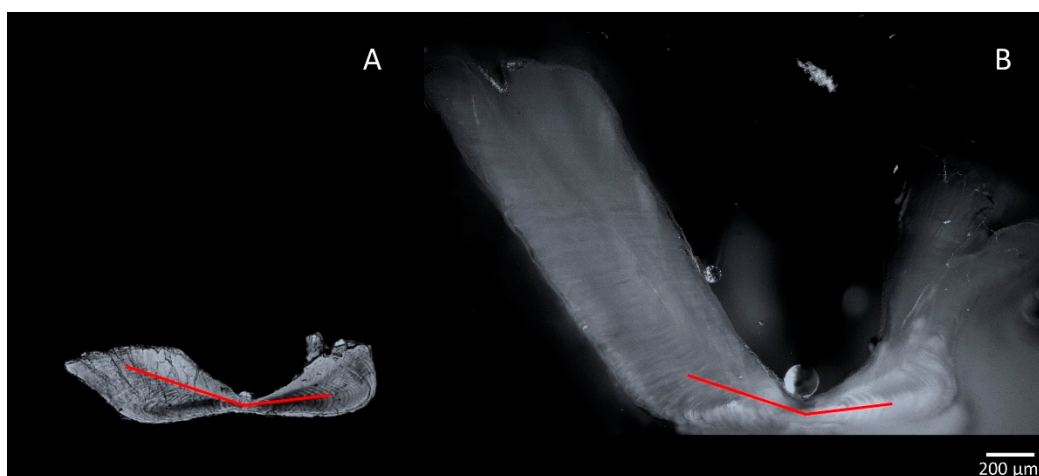

**Figure S1.** The MicroMill drill path used (red line) for oxygen stable isotope analyses in two yellowfin tunas of 29 cm FL (A) and 134 cm FL (B) otolith transverse sections.

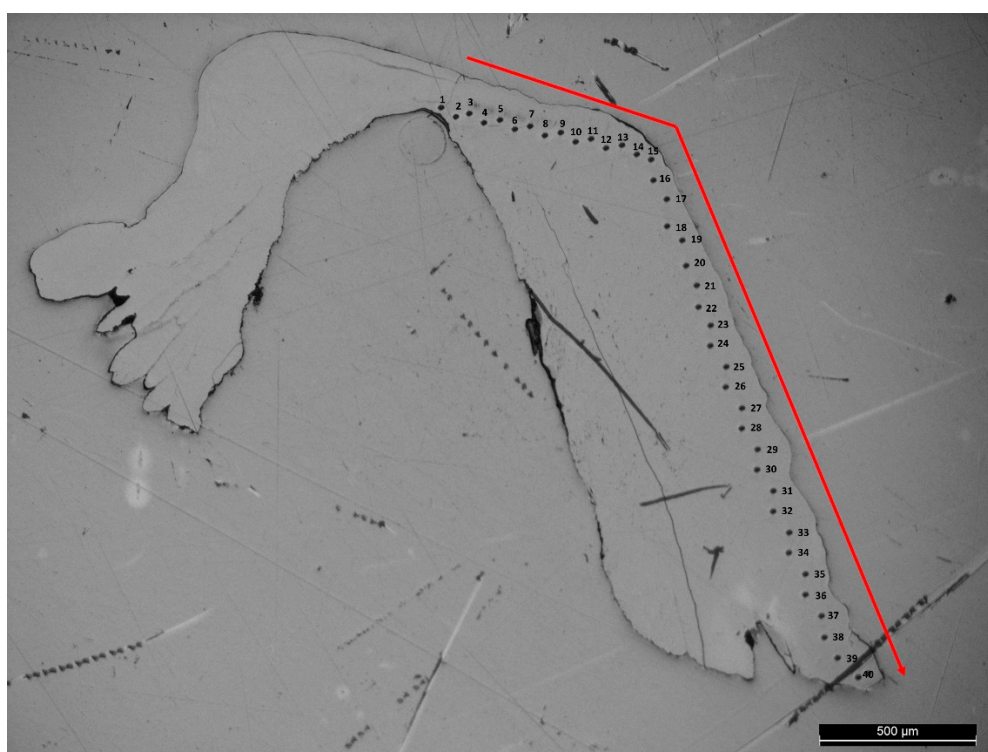

**Figure S2.** Transverse section of an adult yellowfin tuna (*Thunnus albacares*) otolith showing the transect (red line) followed and spot analysis locations (black numbering) for  $\delta^{18}\text{O}$  SIMS analysis.

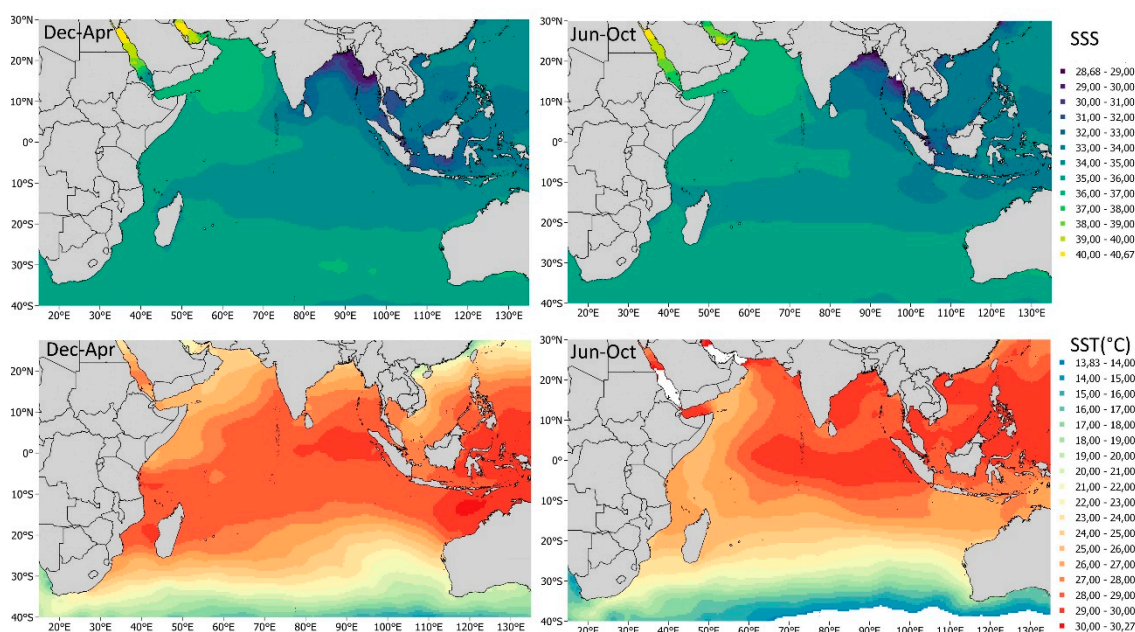

**Figure S3.** Seasonal mean sea surface salinity (SSS, top panels) and sea surface temperature (SST, bottom panels) in the Indian Ocean averaged for the 2017–2018 period in December, January, February and March (left-hand panels) and June, July, August, September and October (right hand panels). Monthly data was obtained from the “INSITU\_GLO\_TS\_OA\_NRT\_OBSERVATIONS\_013\_002\_a” product available in the EU Copernicus Marine Service Information.

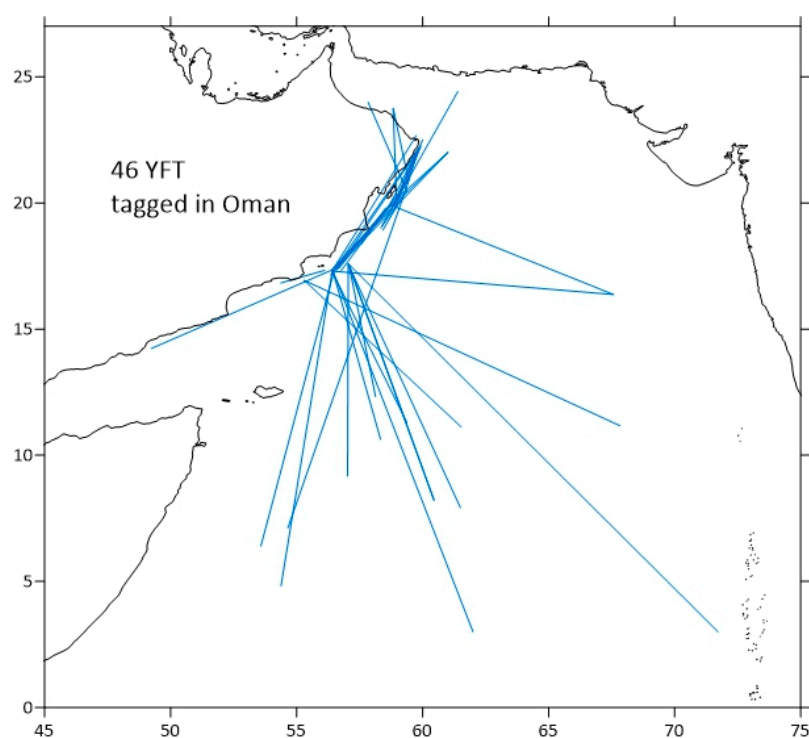

**Figure S4.** Trajectories of 46 yellowfin tuna (*Thunnus albacares*) tagged off Oman. Data from the RTTP-IO database (<https://www.iotc.org/tagging-data-2014-0>, accessed on 10 March 2021).

**Table S1.** Raw secondary ion mass spectrometry measurements of  $\delta^{18}\text{O}$  along the growth axis of an otolith of a 134 cm FL yellowfin tuna (*Thunnus albacares*) captured in South Africa.

| Otolith position | Isotope (VSMOW) |
|------------------|-----------------|
| 1                | 25.50644967     |
| 2                | 25.90928783     |
| 3                | 26.23297005     |
| 4                | 25.26494845     |
| 5                | 26.34439337     |
| 6                | 26.28943797     |
| 7                | 26.42254094     |
| 8                | 25.92441316     |
| 9                | 25.90424605     |
| 10               | 26.2249032      |
| 11               | 25.94911788     |
| 12               | 26.12406762     |
| 13               | 25.77013472     |
| 14               | 26.24406196     |
| 15               | 26.01365265     |
| 16               | 26.13919295     |
| 17               | 25.52611261     |
| 18               | 25.48477002     |
| 19               | 25.7661013      |
| 20               | 25.94558864     |
| 21               | 26.55413138     |
| 22               | 26.16339349     |
| 23               | 26.78504486     |
| 24               | 26.7431981      |
| 25               | 26.91814783     |
| 26               | 26.649421       |
| 27               | 26.79613678     |
| 28               | 26.30910091     |
| 29               | 27.2110752      |
| 30               | 26.37212315     |
| 31               | 26.99730377     |
| 32               | 26.69630955     |
| 33               | 27.27157655     |
| 34               | 27.09511428     |
| 35               | 28.46799074     |
| 36               | 27.46719758     |
| 37               | 27.94062064     |
| 38               | 26.85613395     |
| 39               | 27.29376038     |
| 40               | 27.09410593     |
